# Supplementary material
Source: PubMed Central journal article supplement (PMC10957300)
Supplement: NIHMS1960279-supplement-Appendix_A.pdf [file NIHMS1960279-supplement-Appendix_A.pdf]

**Figure S2a-b. Bee swarm boxplot comparing CD4+ CD70 DNA methylation levels between controls and SLE cases, based on pyrosequencing.** Each dot represents the intra-person mean methylation for the 10 CpG sites. Overall, *CD70* is significantly hypermethylated in SLE cases compared to controls. Solid markers (●) designate persons with complete methylation data (all 10 CpG sites); hollow markers (□) designate individuals with missing values for one or more of the 10 CpG sites.

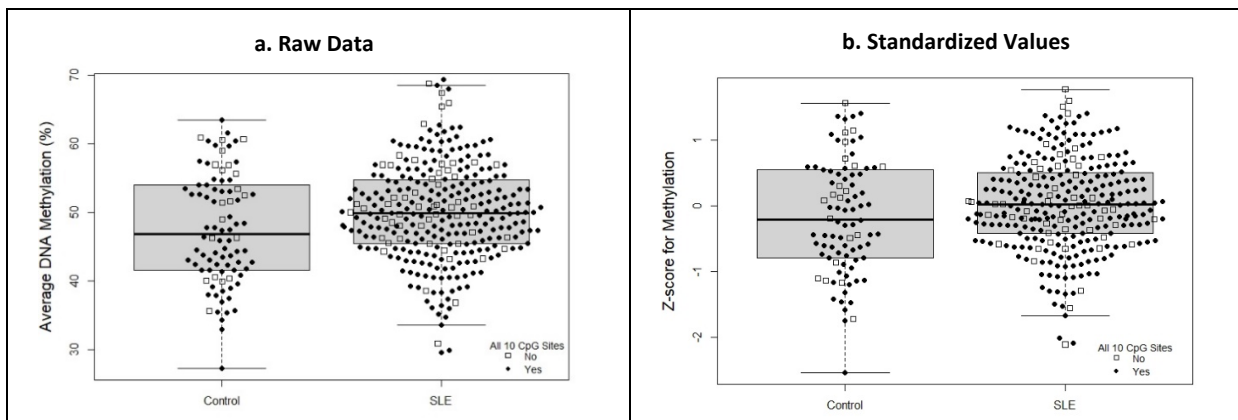

Raw data:  $p=0.01$  (overall);  $p=0.007$  (subset with all sites complete)

Standardized data:  $p=0.06$  (overall);  $p=0.04$  (subset with all sites complete)

Boxplots: lower and upper hinges of box represent 25<sup>th</sup> & 75<sup>th</sup> percentiles; horizontal line within box represents median; markers outside the whiskers represent outliers (outer 2.5 percentiles).

**Table S2. Regression results for the associations between SLE-Control status and age with DNA Methylation Levels at 18 CD70 CpG Sites Included on the MethylationEPIC Array, in CD4+ and CD8+ T cells**

| Probe ID   | Location <sup>^</sup> | Region Relative to Gene | CD4+ T Cells   |                  |                  |                  | CD8+ T cells   |                  |                  |                  |
|------------|-----------------------|-------------------------|----------------|------------------|------------------|------------------|----------------|------------------|------------------|------------------|
|            |                       |                         | SLE vs Control |                  | Age              |                  | SLE vs Control |                  | Age              |                  |
|            |                       |                         | Estimate (SE)  | p-value          | Estimate (SE)    | p-value          | Estimate (SE)  | p-value          | Estimate (SE)    | p-value          |
| cg04312604 | chr19:6594232         | promoter/upstream       | -0.83 (0.58)   | 0.153            | 0.0176 (0.0198)  | 0.374            | -0.45 (1.64)   | 0.782            | -0.1584 (0.0434) | <b>&lt;0.001</b> |
| cg03316332 | chr19:6594222         | promoter/upstream       | -1.69 (0.59)   | <b>0.005</b>     | 0.0326 (0.0201)  | 0.106            | 0.05 (1.79)    | 0.976            | -0.0767 (0.0473) | 0.107            |
| cg11904429 | chr19:6592543         | 1500 bp upstream of TSS | -7.08 (1.65)   | <b>&lt;0.001</b> | -0.0353 (0.056)  | 0.529            | -8.26 (3.74)   | <b>0.028</b>     | -0.3703 (0.0989) | <b>&lt;0.001</b> |
| cg22633597 | chr19:6591663         | 1500 bp upstream of TSS | -0.47 (1.19)   | 0.692            | 0.0983 (0.0404)  | <b>0.015</b>     | 3.83 (2.55)    | 0.135            | 0.2984 (0.0675)  | <b>&lt;0.001</b> |
| cg22431965 | chr19:6591489         | 1500 bp upstream of TSS | -0.27 (0.22)   | 0.232            | 0.0121 (0.0075)  | 0.108            | -1.41 (0.61)   | <b>0.021</b>     | 0.0621 (0.016)   | <b>&lt;0.001</b> |
| cg04120164 | chr19:6591276         | 200 bp upstream of TSS  | -0.02 (0.06)   | 0.744            | -0.0011 (0.0022) | 0.607            | -0.08 (0.13)   | 0.563            | -0.0077 (0.0035) | <b>0.032</b>     |
| cg13119122 | chr19:6591214         | 200 bp upstream of TSS  | -0.07 (0.06)   | 0.294            | -0.0025 (0.0021) | 0.240            | -0.14 (0.1)    | 0.177            | -0.0023 (0.0027) | 0.389            |
| cg23263923 | chr19:6591193         | 200 bp upstream of TSS  | -0.15 (0.07)   | <b>0.039</b>     | -0.009 (0.0024)  | <b>&lt;0.001</b> | 0.11 (0.14)    | 0.427            | -0.0086 (0.0037) | <b>0.022</b>     |
| cg21779443 | chr19:6591160         | 200 bp upstream of TSS  | -0.2 (0.08)    | <b>0.013</b>     | -0.0027 (0.0027) | 0.322            | -0.16 (0.17)   | 0.336            | -0.0048 (0.0044) | 0.272            |
| cg24778383 | chr19:6590884         | in gene                 | 0.04 (0.06)    | 0.489            | 0.0024 (0.0019)  | 0.207            | 0.01 (0.12)    | 0.937            | -0.0051 (0.0031) | 0.101            |
| cg14870229 | chr19:6590790         | in gene                 | 0.5 (0.26)     | 0.058            | 0.0458 (0.0089)  | <b>&lt;0.001</b> | 0.61 (0.71)    | 0.389            | 0.0674 (0.0187)  | <b>&lt;0.001</b> |
| cg25949886 | chr19:6590505         | in gene                 | -0.02 (0.03)   | 0.487            | 0.0002 (0.0009)  | 0.845            | 0.02 (0.05)    | 0.719            | -0.0019 (0.0014) | 0.196            |
| cg18475039 | chr19:6590095         | in gene                 | 0.2 (0.22)     | 0.365            | 0.0212 (0.0075)  | <b>0.005</b>     | 0.75 (0.99)    | 0.451            | 0.0958 (0.0263)  | <b>&lt;0.001</b> |
| cg27335924 | chr19:6588887         | in gene                 | 2.26 (0.94)    | <b>0.016</b>     | 0.094 (0.0318)   | <b>0.003</b>     | 4.82 (3.02)    | 0.112            | 0.3681 (0.0798)  | <b>&lt;0.001</b> |
| cg17136649 | chr19:6588885         | in gene                 | 2.9 (0.98)     | <b>0.003</b>     | 0.0763 (0.0332)  | <b>0.022</b>     | 4.61 (2.96)    | 0.121            | 0.3132 (0.0785)  | <b>&lt;0.001</b> |
| cg15679532 | chr19:6588827         | in gene                 | 0.34 (0.25)    | 0.171            | 0.0056 (0.0084)  | 0.505            | 0.87 (0.97)    | 0.369            | 0.065 (0.0256)   | <b>0.012</b>     |
| cg15267702 | chr19:6588798         | in gene                 | 0.66 (0.28)    | <b>0.018</b>     | 0.0144 (0.0095)  | 0.130            | 2.2 (1.17)     | 0.060            | 0.1097 (0.0308)  | <b>&lt;0.001</b> |
| cg10807045 | chr19:6588142         | in gene                 | 2.28 (0.64)    | <b>&lt;0.001</b> | 0.0411 (0.0217)  | 0.059            | 5.32 (1.46)    | <b>&lt;0.001</b> | 0.1204 (0.0386)  | <b>0.002</b>     |

Estimates are from linear regression models of each CpG site, adjusting for race (Black, White, other/unknown), sex, age, and case/control status.

Estimates are shown for variables of interest - SLE cases compared to controls and age (in years). Estimates represent the % increase or decrease in DNA methylation at the CpG site.

p-value <0.05 in bold

<sup>^</sup>Genomic location from GRCh38/hg38 build

**Table S3. Regression Results for Models of DNA Methylation Levels at 18 CD70 CpG Sites Included on the MethylationEPIC Array in CD4+ and CD8+ T cells: Assessing Interactions between SLE-Control Status and Age**

| Probe ID   | Location <sup>^</sup> | CD4+ T Cells   |              |               |              |               |              | CD8+ T cells   |         |               |              |               |         |
|------------|-----------------------|----------------|--------------|---------------|--------------|---------------|--------------|----------------|---------|---------------|--------------|---------------|---------|
|            |                       | SLE vs Control |              | Age           |              | Case*Age      |              | SLE vs Control |         | Age           |              | Case*Age      |         |
|            |                       | Estimate (SE)  | p-value      | Estimate (SE) | p-value      | Estimate (SE) | p-value      | Estimate (SE)  | p-value | Estimate (SE) | p-value      | Estimate (SE) | p-value |
| cg04312604 | chr19:6594232         | 3.61 (2.58)    | 0.163        | 0.08 (0.04)   | <b>0.049</b> | -0.08 (0.05)  | 0.078        | -0.18 (6.66)   | 0.979   | -0.15 (0.11)  | 0.158        | -0.01 (0.12)  | 0.966   |
| cg03316332 | chr19:6594222         | 2.93 (2.63)    | 0.266        | 0.1 (0.04)    | <b>0.018</b> | -0.08 (0.05)  | 0.072        | 2.93 (7.25)    | 0.687   | -0.03 (0.12)  | 0.785        | -0.05 (0.13)  | 0.683   |
| cg11904429 | chr19:6592543         | -5.24 (7.35)   | 0.477        | -0.01 (0.11)  | 0.927        | -0.03 (0.13)  | 0.797        | -6.53 (15.18)  | 0.667   | -0.34 (0.25)  | 0.167        | -0.03 (0.27)  | 0.907   |
| cg22633597 | chr19:6591663         | -6.98 (5.29)   | 0.188        | 0.01 (0.08)   | 0.904        | 0.12 (0.09)   | 0.207        | -7.46 (10.32)  | 0.471   | 0.12 (0.17)   | 0.463        | 0.21 (0.18)   | 0.260   |
| cg22431965 | chr19:6591489         | -1.62 (0.98)   | 0.101        | -0.01 (0.02)  | 0.678        | 0.02 (0.02)   | 0.160        | -2.01 (2.46)   | 0.414   | 0.05 (0.04)   | 0.189        | 0.01 (0.04)   | 0.801   |
| cg04120164 | chr19:6591276         | -0.37 (0.28)   | 0.195        | -0.01 (0)     | 0.179        | 0.01 (0)      | 0.209        | 0.41 (0.54)    | 0.449   | 0 (0.01)      | 0.988        | -0.01 (0.01)  | 0.354   |
| cg13119122 | chr19:6591214         | -0.59 (0.28)   | <b>0.032</b> | -0.01 (0)     | <b>0.023</b> | 0.01 (0)      | 0.051        | -0.58 (0.41)   | 0.156   | -0.01 (0.01)  | 0.171        | 0.01 (0.01)   | 0.263   |
| cg23263923 | chr19:6591193         | 0.21 (0.31)    | 0.514        | 0 (0)         | 0.387        | -0.01 (0.01)  | 0.252        | -0.2 (0.57)    | 0.720   | -0.01 (0.01)  | 0.149        | 0.01 (0.01)   | 0.567   |
| cg21779443 | chr19:6591160         | 0 (0.36)       | 0.994        | 0 (0.01)      | 0.989        | 0 (0.01)      | 0.558        | 0.55 (0.67)    | 0.409   | 0.01 (0.01)   | 0.572        | -0.01 (0.01)  | 0.273   |
| cg24778383 | chr19:6590884         | -0.28 (0.25)   | 0.267        | 0 (0)         | 0.621        | 0.01 (0)      | 0.194        | 0.4 (0.47)     | 0.396   | 0 (0.01)      | 0.899        | -0.01 (0.01)  | 0.392   |
| cg14870229 | chr19:6590790         | -0.65 (1.16)   | 0.577        | 0.03 (0.02)   | 0.089        | 0.02 (0.02)   | 0.312        | -1.82 (2.86)   | 0.526   | 0.03 (0.05)   | 0.524        | 0.04 (0.05)   | 0.382   |
| cg25949886 | chr19:6590505         | 0.04 (0.11)    | 0.723        | 0 (0)         | 0.581        | 0 (0)         | 0.600        | 0.19 (0.22)    | 0.385   | 0 (0)         | 0.825        | 0 (0)         | 0.420   |
| cg18475039 | chr19:6590095         | -0.6 (0.98)    | 0.542        | 0.01 (0.02)   | 0.491        | 0.01 (0.02)   | 0.404        | 3.93 (4.02)    | 0.330   | 0.14 (0.07)   | <b>0.029</b> | -0.06 (0.07)  | 0.416   |
| cg27335924 | chr19:6588887         | -1.91 (4.17)   | 0.646        | 0.04 (0.06)   | 0.560        | 0.08 (0.07)   | 0.305        | 5.26 (12.24)   | 0.668   | 0.37 (0.2)    | 0.062        | -0.01 (0.22)  | 0.970   |
| cg17136649 | chr19:6588885         | -0.98 (4.35)   | 0.822        | 0.02 (0.07)   | 0.724        | 0.07 (0.08)   | 0.360        | 4.36 (12.04)   | 0.718   | 0.31 (0.2)    | 0.117        | 0 (0.21)      | 0.983   |
| cg15679532 | chr19:6588827         | -2.66 (1.09)   | <b>0.015</b> | -0.04 (0.02)  | <b>0.036</b> | 0.05 (0.02)   | <b>0.005</b> | 1.76 (3.93)    | 0.654   | 0.08 (0.06)   | 0.221        | -0.02 (0.07)  | 0.816   |
| cg15267702 | chr19:6588798         | 0.6 (1.24)     | 0.628        | 0.01 (0.02)   | 0.476        | 0 (0.02)      | 0.960        | 2.71 (4.73)    | 0.568   | 0.12 (0.08)   | 0.130        | -0.01 (0.08)  | 0.913   |
| cg10807045 | chr19:6588142         | 4.01 (2.84)    | 0.159        | 0.06 (0.04)   | 0.137        | -0.03 (0.05)  | 0.531        | 3.51 (5.92)    | 0.554   | 0.09 (0.1)    | 0.340        | 0.03 (0.1)    | 0.753   |

Estimates are from linear regression models of each CpG site, adjusting for race (Black, White, other/unknown), sex, age, and case/control status.

Estimates are shown for variables of interest - SLE cases compared to controls, age (in years), and interaction between SLE disease status and age. Estimates represent the % increase or decrease in DNA methylation at the CpG site.

p-value <0.05 in bold

<sup>^</sup>Genomic location from GRCh38/hg38 build
